# Supplementary material for: Supramolecular one-dimensional conducting nanofibers from a C3-symmetric tetrathiafulvalene derivative
Source: publisher site journal article supplement (doi:10.3762/bjnano.17.63), 2026-07-10
Supplement: Additional file 1 [file 2190-4286-17-63-S1.pdf]

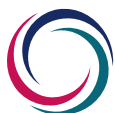

## Supporting Information

for

### **Supramolecular one-dimensional conducting nanofibers from a C<sub>3</sub>-symmetric tetrathiafulvalene derivative**

Yoko Tatewaki, Fumiya Hirose, Sadafumi Nishihara, Tomoyuki Akutagawa,  
Takayoshi Nakamura and Tsuyoshi Minami

*Beilstein J. Nanotechnol.* **2026**, *17*, 872–881. [doi:10.3762/bjnano.17.63](https://doi.org/10.3762/bjnano.17.63)

## Additional figures

## Experimental Section

### FTIR measurements.

FTIR spectra of MeS-TTF-Ts were recorded using a JASCO FT/IR-4200 spectrometer equipped with an ATR accessory. The measurements were performed on the powdered sample at room temperature.

### SEM measurements.

For SEM observations, MeS-TTF-Ts was dissolved in DMF or DMSO at a concentration of 6 mM. The charge-transfer complex sample was prepared by mixing a DMF solution of MeS-TTF-Ts with an acetonitrile solution of F4TCNQ at a molar ratio of 1:3, and the final concentration was adjusted to 6 mM. The resulting solutions were drop-cast onto HOPG substrates and allowed to dry under ambient conditions to form cast films.

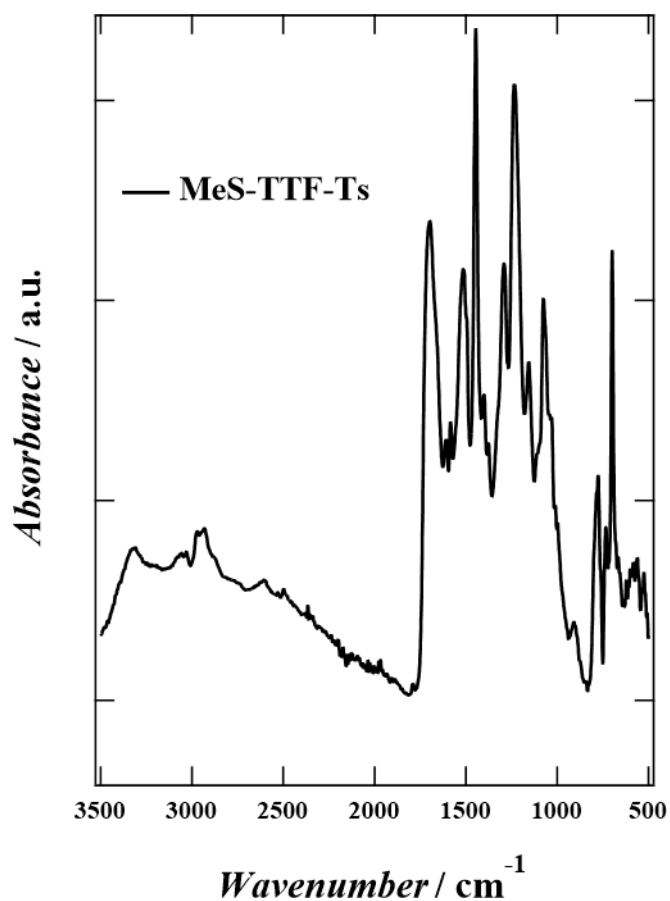

**Figure S1:** FTIR (ATR) spectrum of MeS-TTF-Ts.

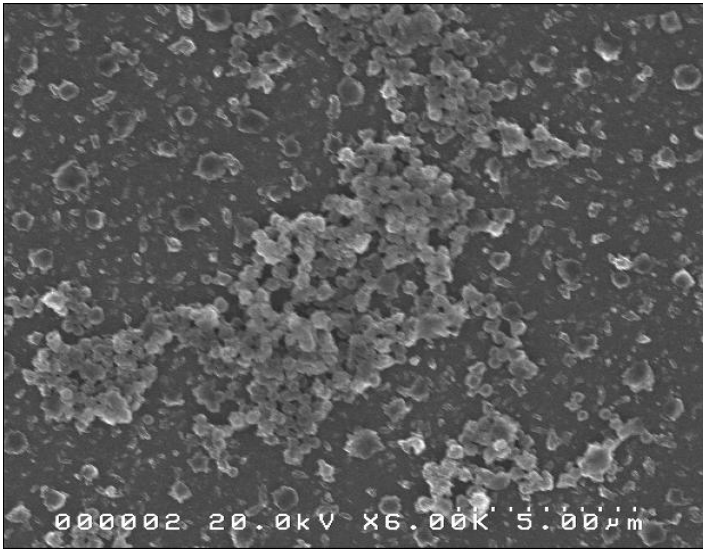

**Figure S2:** SEM image of a cast film of MeS-TTF-Ts deposited from a DMF solution on an HOPG substrate.

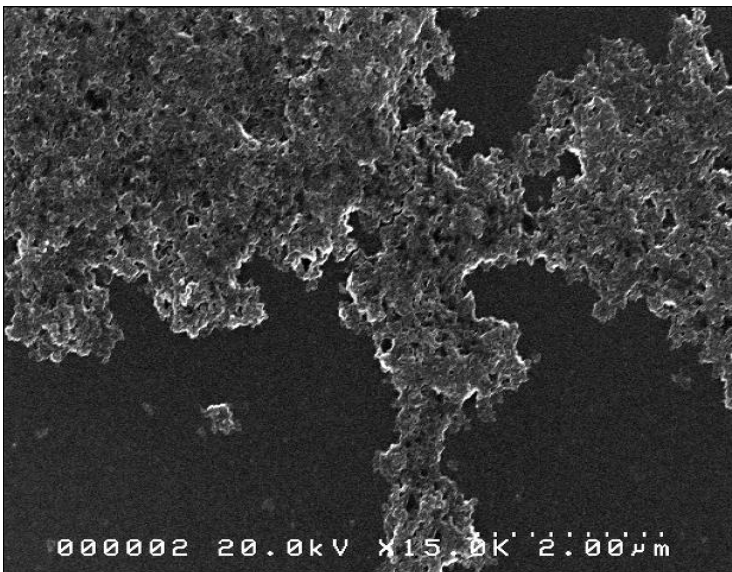

**Figure S3:** SEM image of a cast film of the C3-symmetric (MeS-TTF-Ts)(F4TCNQ)<sub>3</sub> charge-transfer complex deposited from a mixed solution of DMF and acetonitrile on an HOPG substrate.

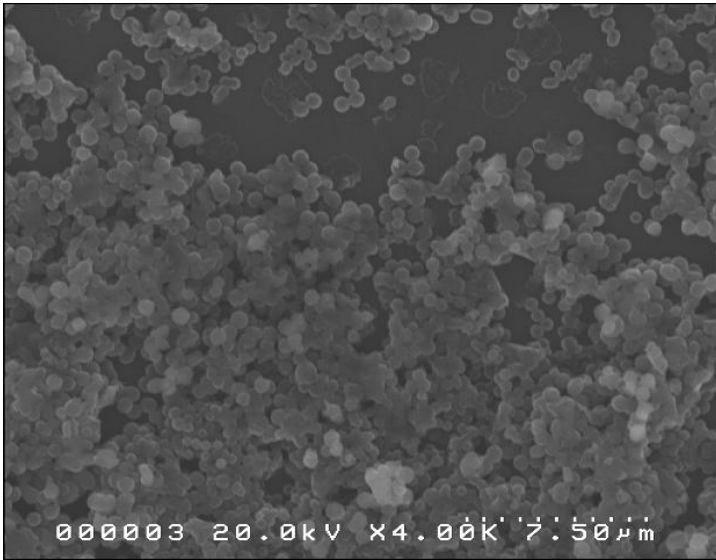

**Figure S4:** SEM image of a cast film of MeS-TTF-Ts deposited from a DMSO solution on an HOPG substrate.
